# Supplementary material for: Protein hydration in living cells probed by Fourier transform infrared (FT-IR) spectroscopic imaging
Source: Royal Society of Chemistry journal article supplement (doi:10.1039/c7an00337d), 2017-01-01
Supplement: c7an00337d1.pdf [file c7an00337d1.pdf]

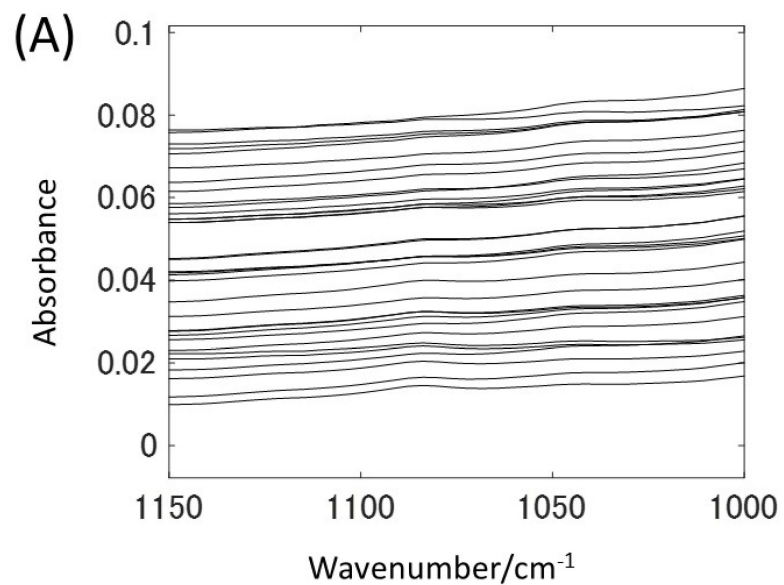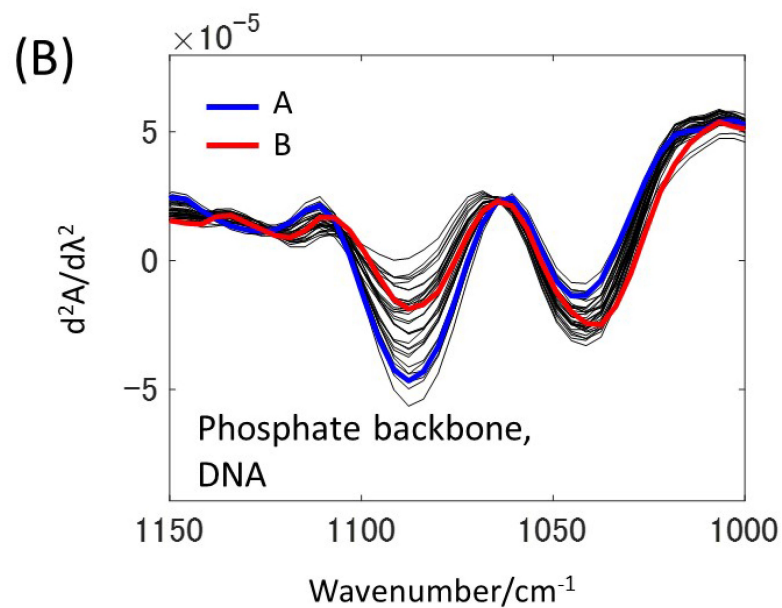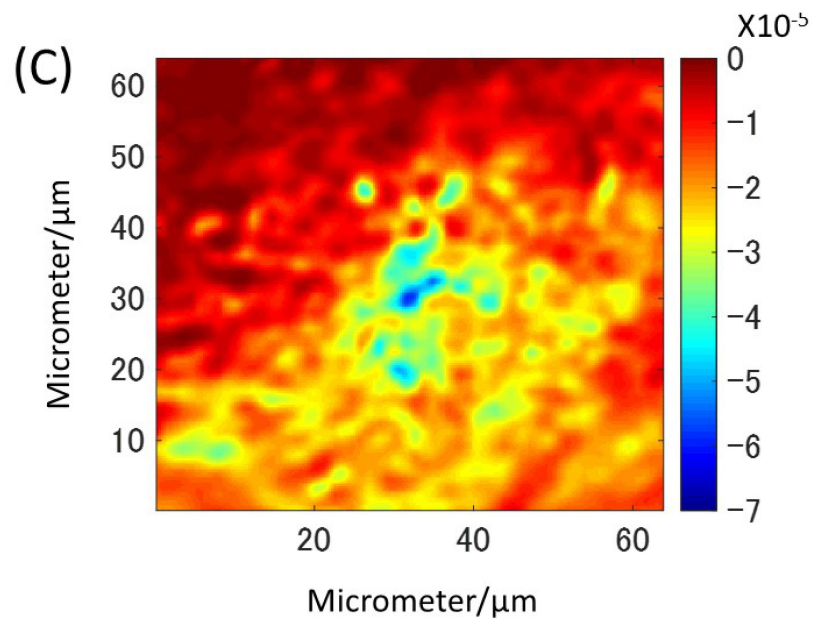

Fig. SI: FT-IR spectra of HEK cell sample over (A) 1150 - 1000 cm<sup>-1</sup> regions, extracted from region indicated by white bars in Fig. 5. (B) The corresponding second derivative spectra, which revealed in the peak at 1085 cm<sup>-1</sup> assignable to phosphate backbone of DNA. (C) An image constructed with the intensity at 1085 cm<sup>-1</sup> of the second derivative spectra, indicating the presence of cellular nucleus in the middle of the image.
